# Supplementary material for: Depth-Based, Motion-Stabilized Colorization of Microscope-Integrated Optical Coherence Tomography Volumes for Microscope-Independent Microsurgery
Source: PubMed Central journal article supplement — Transl Vis Sci Technol. 2018 Nov 1;7(6):1. doi: 10.1167/tvst.7.6.1 (PMC6218157; doi:10.1167/tvst.7.6.1), 2018-11-01
Supplement: tvst-07-05-29_s02.pdf [file tvst-07-05-29_s02.pdf]

## MIOCT Volume Colorization Survey

Thank you for your help in assessing new methods of visualization for the MIOCT system.

### Colorization Explanation

Color is applied to the MIOCT volumes to indicate relative position along the axial dimension of the volume (i.e., height or position along each A-scan). The color is displayed as a linear gradient between positions specified by the MIOCT operator. These positions and colors used in the volumes vary between the images in this survey. The images below demonstrate the colorization effect in some simple volumes:

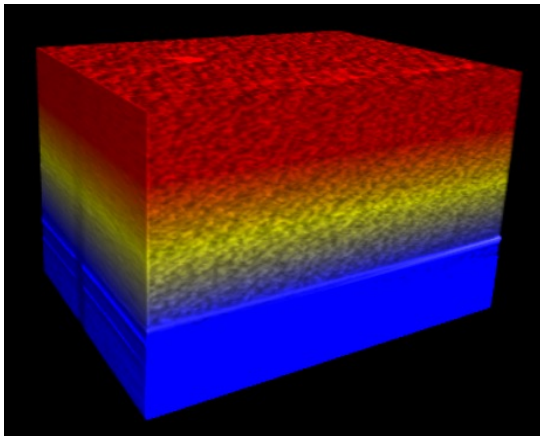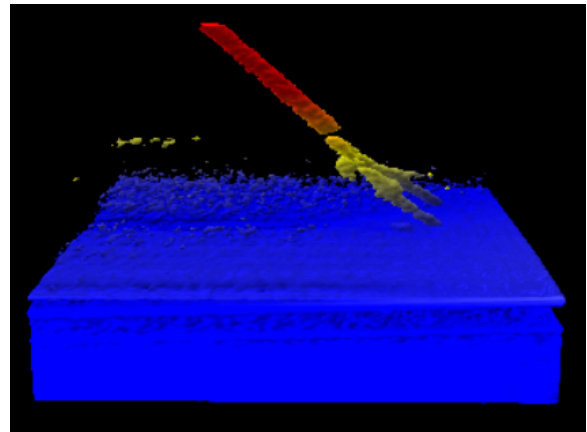

### Instructions

The following survey contains MIOCT volumes from membrane peeling cases. Each image is followed by a series of questions. Instructions for each section precede the images and questions.

**Please DO NOT flip ahead in the survey. Some images are presented in an intentional order.**

We will show a series of grayscale volumes followed by a colorized volume. **Please do not proceed to the following page until you answer the questions for the grayscale volume.**

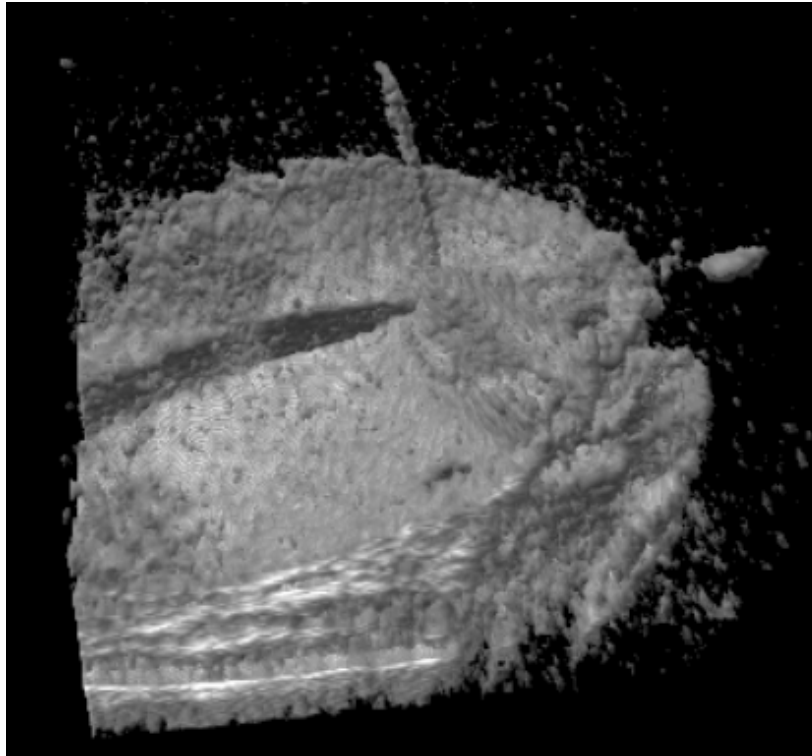

Are you able to differentiate membrane from retina?

Yes                       No                       Unsure

Is there an instrument present?

Yes                       No                       Unsure

If there is an instrument present, is it contacting tissue?

Yes                       No                       Unsure

If there is an instrument present, is it deforming the retina?

Yes                       No                       Unsure

Is there pathology visible in addition to membranes?

Macular hole               Striae               Subretinal Fluid               Blood

The following is a colorized image of the same volume shown previously. Please answer the questions below using the colorized image.

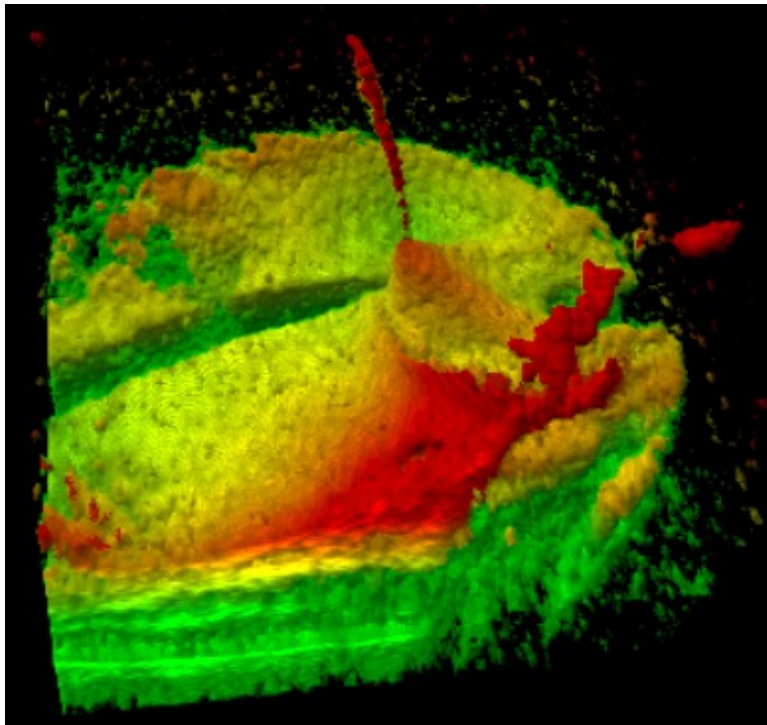

Are you able to differentiate membrane from retina?

Yes             No             Unsure

Is there an instrument present?

Yes             No             Unsure

If there is an instrument present, is it contacting tissue?

Yes             No             Unsure

If there is an instrument present, is it deforming the retina?

Yes             No             Unsure

Is there pathology visible in addition to membranes?

Macular hole     Striae         Subretinal Fluid     Blood

Was it easier to identify membranes with color or without color?

With Color         Without color         No Difference

Was it easier to identify instrument position and activity with color or without color?

With Color         Without color         No Difference

The next section will show a grayscale volume followed by a colorized volume. **Please do not proceed to the following page until you answer the questions for the grayscale volume.**

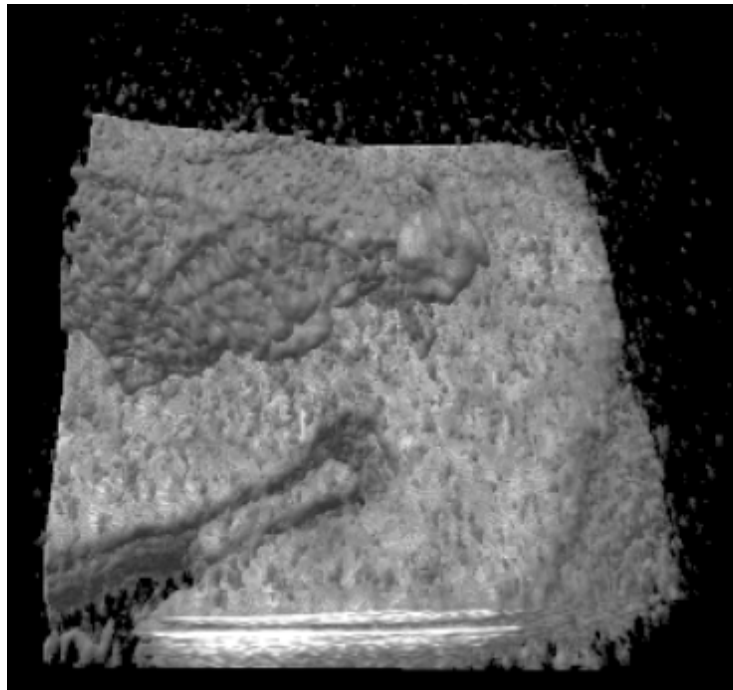

Are you able to differentiate membrane from retina?

Yes             No             Unsure

Is there an instrument present?

Yes             No             Unsure

If there is an instrument present, is it contacting tissue?

Yes             No             Unsure

If there is an instrument present, is it deforming the retina?

Yes             No             Unsure

Is there pathology visible in addition to membranes?

Macular hole     Striae     Subretinal Fluid     Blood

The following is a colorized image of the same volume shown previously. Please answer the questions below using the colorized image.

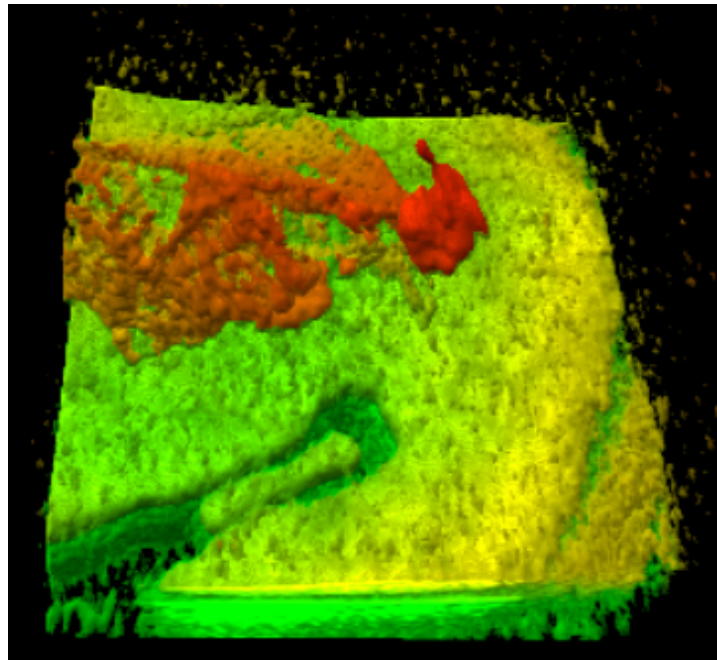

Are you able to differentiate membrane from retina?

Yes             No             Unsure

Is there an instrument present?

Yes             No             Unsure

If there is an instrument present, is it contacting tissue?

Yes             No             Unsure

If there is an instrument present, is it deforming the retina?

Yes             No             Unsure

Is there pathology visible in addition to membranes?

Macular hole     Striae     Subretinal Fluid     Blood

Was it easier to identify membranes with color or without color?

With Color             Without color             No Difference

Was it easier to identify instrument position and activity with color or without color?

With Color             Without color             No Difference

The next section will show a grayscale volume followed by a colorized volume. **Please do not proceed to the following page until you answer the questions for the grayscale volume.**

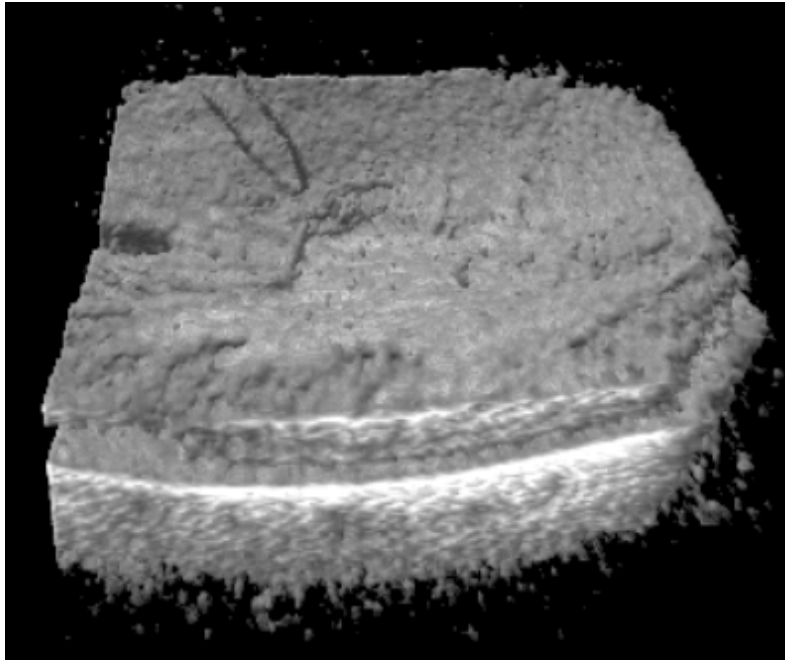

Are you able to differentiate membrane from retina?

Yes             No             Unsure

Is there an instrument present?

Yes             No             Unsure

If there is an instrument present, is it contacting tissue?

Yes             No             Unsure

If there is an instrument present, is it deforming the retina?

Yes             No             Unsure

Is there pathology visible in addition to membranes?

Macular hole     Striae         Subretinal Fluid     Blood

The following is a colorized image of the same volume shown previously. Please answer the questions below using the colorized image.

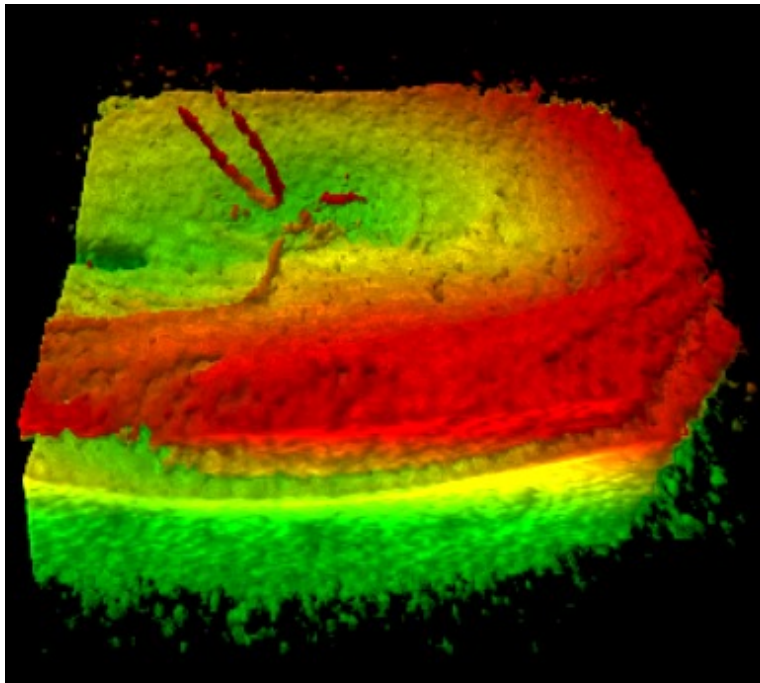

Are you able to differentiate membrane from retina?

Yes             No             Unsure

Is there an instrument present?

Yes             No             Unsure

If there is an instrument present, is it contacting tissue?

Yes             No             Unsure

If there is an instrument present, is it deforming the retina?

Yes             No             Unsure

Is there pathology visible in addition to membranes?

Macular hole     Striae     Subretinal Fluid     Blood

Was it easier to identify membranes with color or without color?

With Color     Without color     No Difference

Was it easier to identify instrument position and activity with color or without color?

With Color     Without color     No Difference

The next section will show a grayscale volume followed by a colorized volume. **Please do not proceed to the following page until you answer the questions for the grayscale volume.**

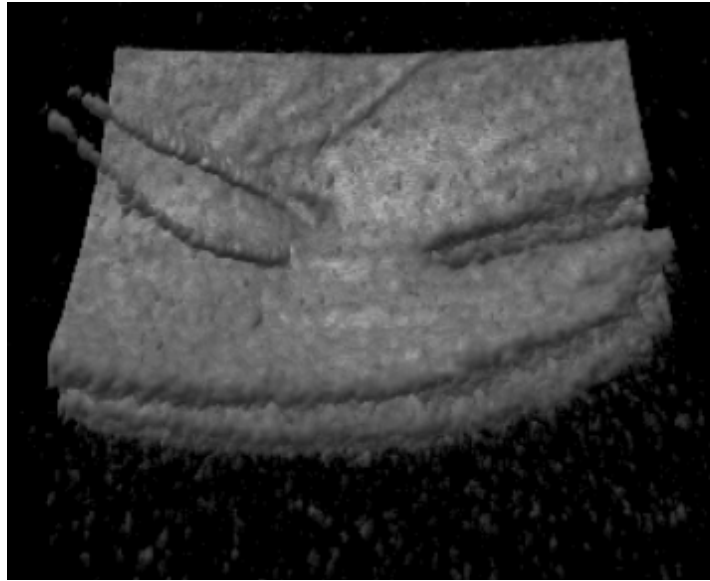

Are you able to differentiate membrane from retina?

Yes             No             Unsure

Is there an instrument present?

Yes             No             Unsure

If there is an instrument present, is it contacting tissue?

Yes             No             Unsure

If there is an instrument present, is it deforming the retina?

Yes             No             Unsure

Is there pathology visible in addition to membranes?

Macular hole     Striae         Subretinal Fluid     Blood



The following is a colorized image of the same volume shown previously. Please answer the questions below using the colorized image.

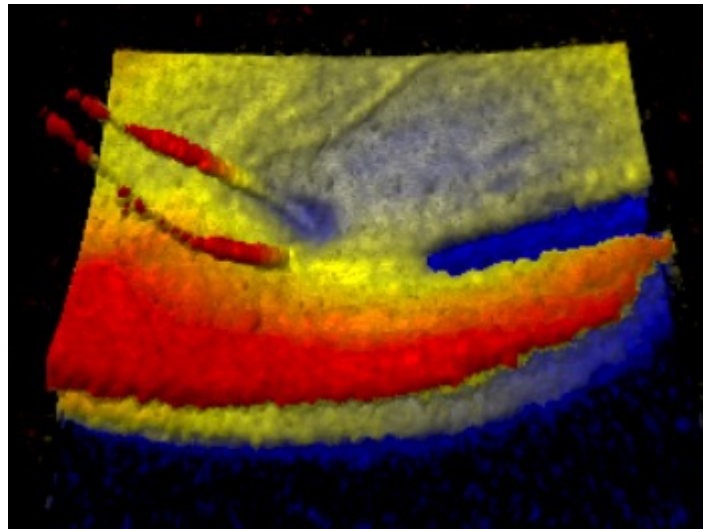

Are you able to differentiate membrane from retina?

Yes             No             Unsure

Is there an instrument present?

Yes             No             Unsure

If there is an instrument present, is it contacting tissue?

Yes             No             Unsure

If there is an instrument present, is it deforming the retina?

Yes             No             Unsure

Is there pathology visible in addition to membranes?

Macular hole     Striae         Subretinal Fluid     Blood

Was it easier to identify membranes with color or without color?

With Color         Without color         No Difference

Was it easier to identify instrument position and activity with color or without color?

With Color         Without color         No Difference

The videos sent with this survey consist of several MIOCT volumes in series during a membrane peel. The first video is grayscale only.

**Please view video 1 now**

Are you able to differentiate membrane from retina?

Yes             No             Unsure

Is there an instrument present?

Yes             No             Unsure

If there is an instrument present, is it contacting tissue?

Yes             No             Unsure

If there is an instrument present, is it deforming the retina?

Yes             No             Unsure

Is there pathology visible in addition to membranes?

Macular hole     Striae         Subretinal Fluid     Blood

The videos sent with this survey consist of several MIOCT volumes in series during a membrane peel. The second video is in color

## **Please view video 2 now**

Are you able to differentiate membrane from retina?

Yes             No             Unsure

Is there an instrument present?

Yes             No             Unsure

If there is an instrument present, is it contacting tissue?

Yes             No             Unsure

If there is an instrument present, is it deforming the retina?

Yes             No             Unsure

Is there pathology visible in addition to membranes?

Macular hole     Striae         Subretinal Fluid     Blood

Was it easier to identify membranes with color or without color?

With Color         Without color         No Difference

Was it easier to identify instrument position and activity with color or without color?

With Color         Without color         No Difference

Do you prefer viewing MIOCT videos with color or without color?

With Color         Without color         No Difference
